# Supplementary material
Source: PubMed Central journal article supplement (PMC2937910)

Supplemental Information

Deficiency of chemokine receptor CCR1 causes osteopenia due to  
impaired functions of osteoclasts and osteoblasts

Akiyoshi Hoshino<sup>1,3,5</sup>, Tadahiro Iimura<sup>4</sup>, Satoshi Ueha<sup>2</sup>, Sanshiro Hanada<sup>1</sup>, Yutaka Maruoka<sup>1,6</sup>,  
Mitsuori Mayahara<sup>7</sup>, Keiko Suzuki<sup>8</sup>, Toshio Imai<sup>9</sup>, Masako Ito<sup>10</sup>, Yoshinobu Manome<sup>5</sup>, Masato  
Yasuhara<sup>3</sup>, Takaaki Kirino<sup>11</sup>, Akira Yamaguchi<sup>4</sup>, Kouji Matsushima<sup>2</sup>, and

Kenji Yamamoto<sup>1,3\*</sup>

*1 International Clinical Research Center, Research Institute, International Medical Center of Japan, Tokyo 162-8655, JAPAN; 2 Department of Molecular Preventive Medicine, Graduate School of Medicine, the University of Tokyo, Tokyo 113-0033, JAPAN; 3 Department of Pharmacokinetics and Pharmacodynamics, and 4 Department of Oral Pathology, Global Center of Excellence, Tokyo Medical and Dental University, Tokyo 113-8519, JAPAN; 5 Department of Molecular Cell Biology, Institute of DNA Medicine, Research Center for Medical Sciences, Jikei University School of Medicine, Tokyo 105-8461, Japan; 6 Toyama National Hospital, International Medical Center of Japan, Tokyo 162-8655, Japan; 7 Department of Oral Histology, and 8 Department of Pharmacology, School of Dentistry, Showa University, Tokyo 142-8555, JAPAN; 9 Kan Research Institute, Inc., Kobe 650-0047, JAPAN; 10 Department of Radiology, Nagasaki University School of Medicine, Nagasaki 852-8501, Japan; 11 President of International Medical Center of Japan,*

*Tokyo 162-8655, JAPAN.*

**This file includes:**

1. Supplemental Figures1-3
2. Supplemental Figure Legends

## Supplemental Figure Legends

**Supplemental Figure 1. Expression of CCR1-related chemokine ligands by bone marrow macrophages, preosteoclasts and mature osteoclasts by wild-type and CCR1<sup>-/-</sup> mice.** *The panel shows the relative expression levels of CCR1-related chemokines (Ccl3, Ccl4, Ccl5, Ccl9, and Ccl11) and CCR2-related chemokines (Ccl2 and Ccl12) by Ccr1<sup>-/-</sup> osteoblasts as measured by realtime Q-PCR (mean ± SEM, n=3).*

**Supplemental Figure 2. The effect of chemokine neutralization during osteoblastogenesis.** *Total RNAs were isolated from osteoblastic cells after treatment for 21 days at the indicated concentrations of anti-CCL9 neutralizing antibodies. Realtime Q-PCR quantified the relative expression levels of osteoblast-related transcriptional factor mRNAs (Runx-2, Osterix, Atf4) and osteoblast-related marker mRNAs (Osteonectin, Osteopontin, Osteocalcin, and Collagen1a1). Data are expressed as the copy numbers of these markers as normalized to Gapdh expression (mean ± SEM, n=4).*

**Supplemental Figure 3. Immunostaining of CCR1 by osteoclasts.** *The panel shows the expression of CCR1 protein in mature osteoclasts as detected by immunostaining (shown in red). Nuclei were counterstained with by hoechst33258 dye (shown in blue) (magnification ×400). The arrow shows the localization of CCR1 in the pseudopod-like structure.*

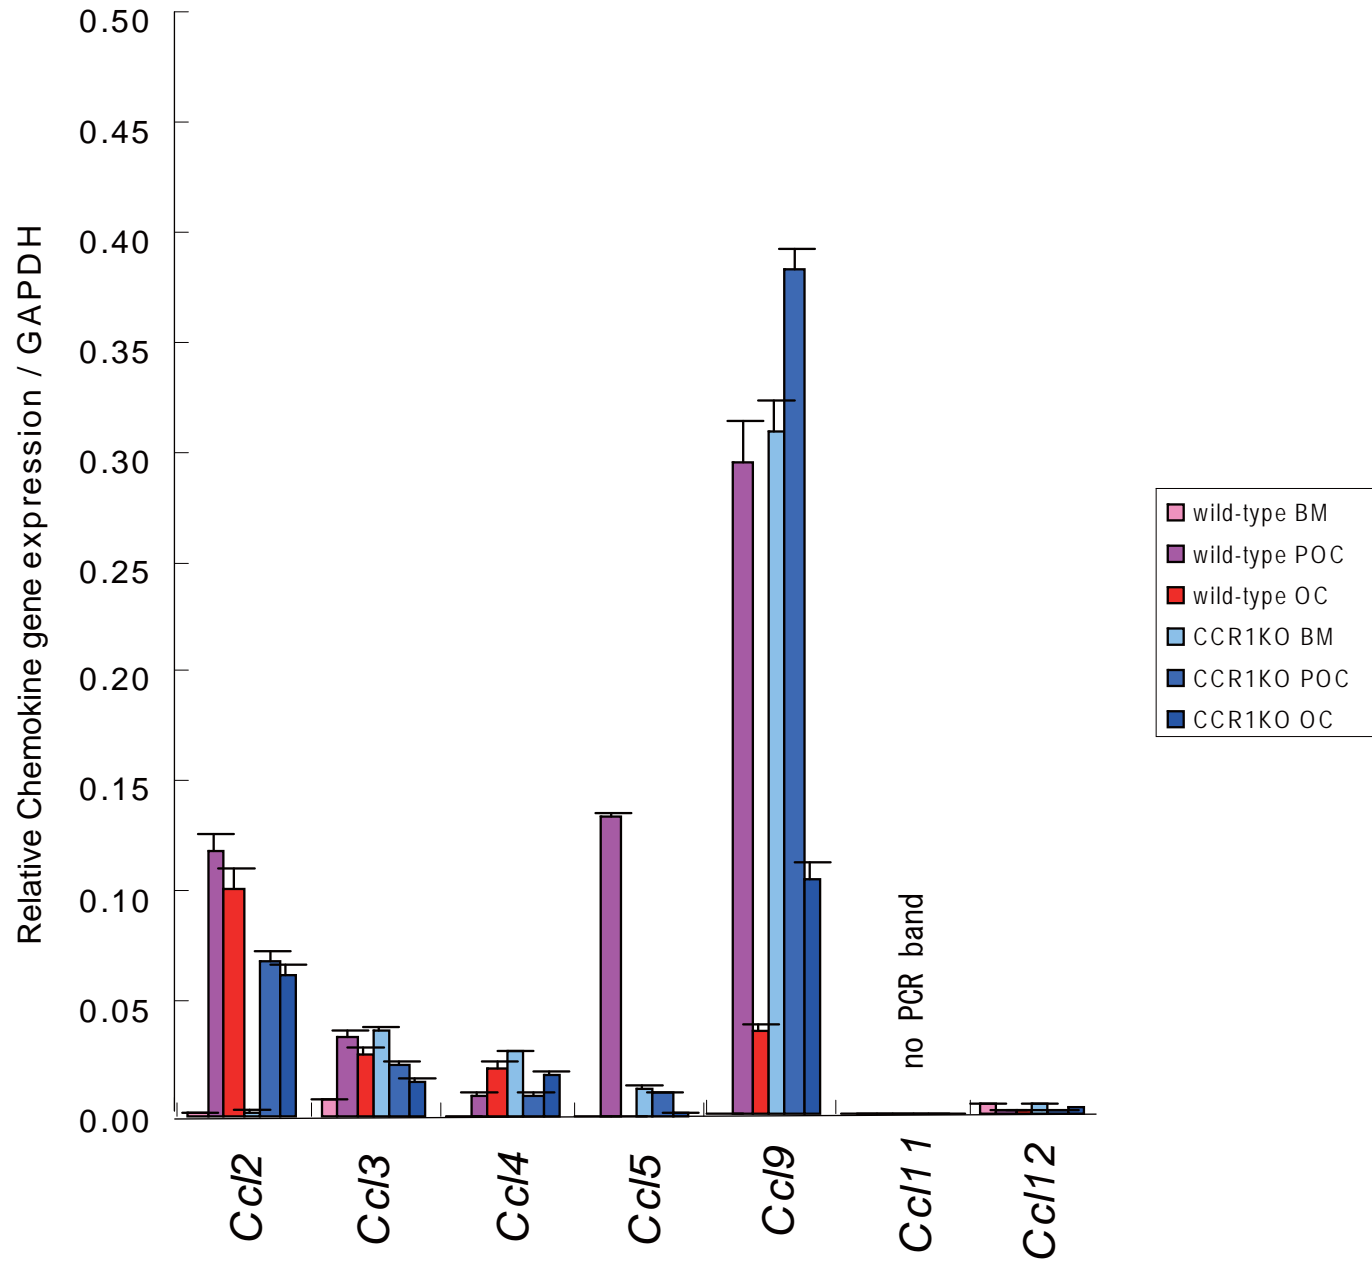

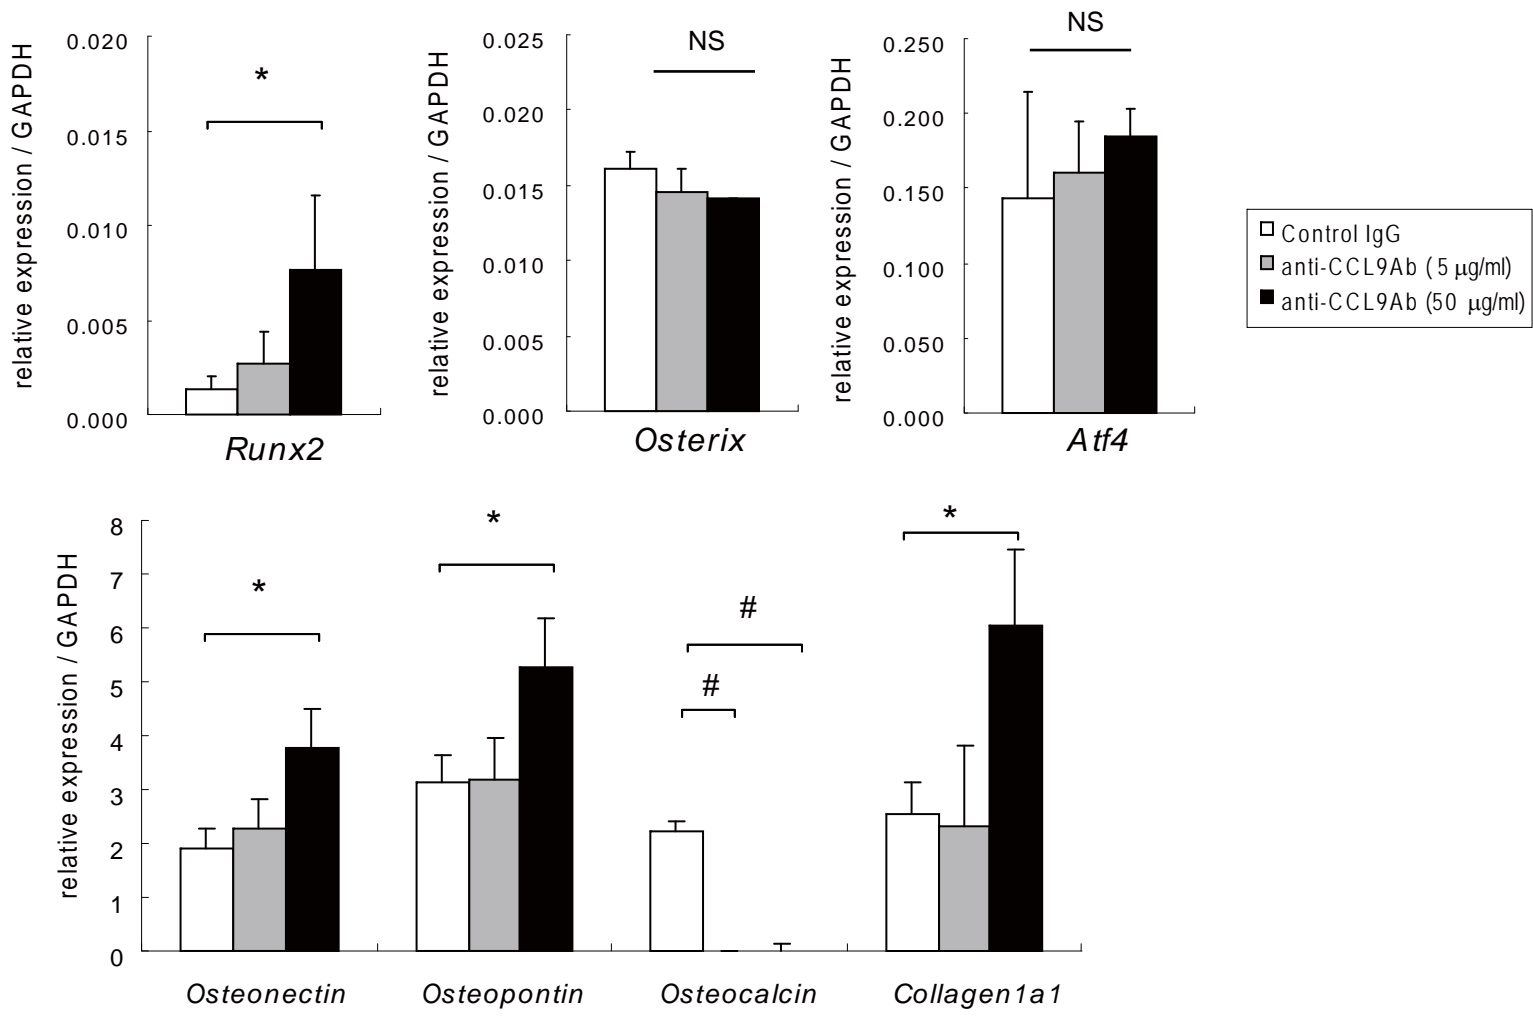

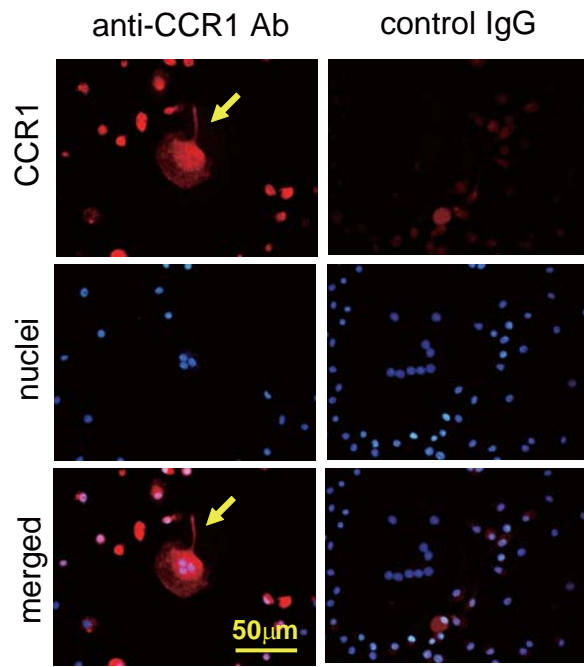

Supplement: supp_M109.099424_jbc.M109.099424-1.pdf [file supp_M109.099424_jbc.M109.099424-1.pdf]
